1

2 Title: **The effect of abiotic and biotic stress on the salicylic acid biosynthetic pathway**  
3 **from mandelonitrile in peach**

4

5 Bernal-Vicente Agustina<sup>1</sup> ([abernal@abiopep.com](mailto:abernal@abiopep.com)); Petri Cesar<sup>2</sup> ([cesar.petri@upct.es](mailto:cesar.petri@upct.es));  
6 Hernández José Antonio<sup>1</sup> ([jahernan@cebas.csic.es](mailto:jahernan@cebas.csic.es)); Díaz-Vivancos Pedro<sup>1\*</sup>  
7 ([pdv@cebas.csic.es](mailto:pdv@cebas.csic.es))

8

9

10 <sup>1</sup> Biotechnology of Fruit Trees Group, Dept. Plant Breeding, CEBAS-CSIC, Campus  
11 Universitario de Espinardo, 25. 30100 Murcia (Spain)

12 <sup>2</sup> Departamento de Producción Vegetal, Universidad Politécnica de Cartagena, Paseo  
13 Alfonso XIII, 48, 30203 Cartagena (Spain)

14

15

16 \*Corresponding author

17 Dr. Pedro Díaz-Vivancos ([pdv@cebas.csic.es](mailto:pdv@cebas.csic.es))

18 CEBAS-CSIC, Campus Universitario de Espinardo, 25. 30100 Murcia (Spain)

19 Phone number: +34 968 396200 ; FAX: +34 968 396213

20

21

22 Date of submission: 17 October 2017

23 Number of tables: 2

24 Number of figures: 7

25 Word count: 4890

26

27

28

29

30

31

32 Title: **The effect of abiotic and biotic stress on the salicylic acid biosynthetic pathway**  
33 **from mandelonitrile in peach**

34

35 Running title: **Salicylic acid biosynthesis from mandelonitrile under stress**

36

37 **Highlight:**

38 We show that the recently suggested third pathway for SA biosynthesis from  
39 mandelonitrile in peach is also functional under both abiotic and biotic stress conditions.

40

41

42 **Abstract**

43 Salicylic acid (SA) plays a central role in plant responses to environmental stresses via the  
44 SA-mediated regulation of many metabolic and molecular processes. In a recent study, we  
45 suggested a third pathway for SA biosynthesis from mandelonitrile (MD) in peach plants.  
46 This pathway is alternative to the phenylalanine ammonia-lyase pathway and links SA  
47 biosynthesis and cyanogenesis. In the present work, we show that this new SA biosynthetic  
48 pathway is also functional under abiotic (salt) and biotic (*Plum pox virus* infection) stress  
49 conditions, although the contribution of this pathway to the SA pool does not seem to be  
50 important under such conditions. Treating peach plants with MD not only affected the SA  
51 content, but it also had a pleiotropic effect on abscisic acid and jasmonic acid levels, two  
52 well-known stress related hormones, as well as on the H<sub>2</sub>O<sub>2</sub>-related antioxidant activities.  
53 Furthermore, MD improved plant performance under the stressful conditions, probably via  
54 the activation of different signaling pathways. We have thus proven that SA is not limited  
55 to biotic stress responses, but that it also plays a role in the response to abiotic stress in  
56 peach, although the physiological functions of this new SA biosynthetic pathway from MD  
57 remain to be elucidated.

58

59

60

61 **Keywords:** antioxidative metabolism; cyanogenesis; mandelonitrile; metabolomics; peach;  
62 *Plum pox virus*; salicylic acid; salt stress

63

## 64 **Abbreviations**

65 ABA, abscisic acid; APX, ascorbate peroxidase; BA, benzoic acid; CAT, catalase; CNgls,  
66 cyanogenic glycosides; MD, mandelonitrile; NPR1, non-expressor of pathogenesis-related  
67 gene; PAL, phenylalanine ammonia-lyase; Phe, phenylalanine; POX, peroxidase; PPV,  
68 Plum pox virus; SA, salicylic acid; SOD, superoxide dismutase; TRX, thioredoxins

69

70

71

72

## 73 **Introduction**

74 The role of phytohormones alleviating the adverse effects of both abiotic and biotic  
75 stresses in plants has been widely described in the literature. Among the plant hormones,  
76 salicylic acid (SA) acts as a signalling and regulatory molecule in plant responses to  
77 environmental stresses via the SA-mediated control of metabolic and molecular processes  
78 (Khan *et al.*, 2015; Liu *et al.*, 2015). In a previous work, we described a third pathway for  
79 SA biosynthesis from mandelonitrile (MD) in peach plants. In this pathway, MD acts as an  
80 intermediary molecule between cyanogenic glycoside turnover and SA biosynthesis (Diaz-  
81 Vivancos *et al.*, 2017). The contribution of the different biosynthetic pathways to the total  
82 SA content varies depending on the plant species, the physiological and developmental  
83 stage, and the environmental conditions (Catinot *et al.*, 2008; Chen *et al.*, 2009; Dempsey  
84 *et al.*, 2011; Ogawa *et al.*, 2006). For example, although it is generally accepted that the  
85 contribution of the phenylalanine (Phe) ammonia-lyase (PAL) pathway to the total SA pool  
86 is small, this pathway gains importance during plant-pathogen interactions (Liu *et al.*,  
87 2015). Moreover, treatment with 1 mM MD has been found to increase SA content and  
88 provide partial protection against *Plum pox virus* (PPV) infection in peach plants (Diaz-  
89 Vivancos *et al.* 2017).

90 Both biotic and abiotic environmental stresses lead to considerable yield drop,  
91 causing important economic losses. Among biotic stresses, Sharka, a common disease  
92 caused by PPV, is the most important viral disease affecting *Prunus* species. In previous  
93 studies, we have shown that PPV infection induces oxidative stress at the subcellular level  
94 in susceptible varieties (Diaz-Vivancos *et al.*, 2006; Hernandez *et al.*, 2006). On the other  
95 hand, salinity is one of the most significant abiotic challenges affecting plant productivity,

96 particularly in arid and semi-arid climates (Acosta-Motos *et al.*, 2017). In order to cope  
97 with stressful conditions, plants have to induce different physiological and biochemical  
98 mechanisms. One common consequence of exposure to environmental stress conditions is  
99 the establishment of oxidative signaling that triggers defense pathways (Foyer and Noctor,  
100 2005). The defense signaling output occurs in conjunction with other plant signaling  
101 molecules, particularly SA. Moreover, other hormones such as jasmonic acid (JA) and  
102 abscisic acid (ABA) have been described as regulators/modulators of plant defense  
103 responses. The crosstalk between hormone pathways therefore determines plant responses  
104 to environmental stresses at multiple levels (Alazem and Lin, 2015).

105         Due to its role in diverse biological processes, SA has been proposed as a potential  
106 agronomic factor for improving the stress response in plants of agro-economic interest.  
107 Nevertheless, even though SA has been the focus of intensive research, the physiological,  
108 biochemical and molecular mechanisms underpinning SA-induced stress tolerance have not  
109 been fully characterized (Khan *et al.*, 2015). The accumulation of SA in response to several  
110 stress conditions has been described, as has the induction of stress tolerance by the  
111 exogenous application of SA or analogues; nevertheless, the mechanisms by which SA  
112 biosynthesis is regulated by each stress are poorly understood (Miura and Tada, 2014).

113         In this work, we analyzed the effect of abiotic (NaCl) and biotic (*Plum pox virus*  
114 infection) stresses on the SA biosynthesis from MD in micropropagated peach shoots and  
115 in peach seedlings. In addition, because it has been described that SA can induce redox  
116 stress via increased H<sub>2</sub>O<sub>2</sub> content (Durner and Klessig, 1995; Rao *et al.*, 1997), we also  
117 determined the activities of H<sub>2</sub>O<sub>2</sub>-scavenging [ascorbate peroxidase (APX), peroxidase  
118 (POX) and catalase (CAT)] and H<sub>2</sub>O<sub>2</sub>-producing [superoxide dismutase (SOD)] enzymes.  
119 Finally, we also analyzed the ABA and JA content, as well as the expression of two genes  
120 involved in redox signaling in peach seedlings.

121

122

123

124

## 125 **Material and Methods**

### 126 *Plant material*

127 The assays were performed on micropropagated GF305 peach (*Prunus persica* L.)  
128 shoots and GF305 peach seedlings, which were submitted to mild NaCl stress and PPV-  
129 infection, either in the presence or absence of MD and Phe (MD precursor) treatments.

130 In the micropropagated shoots, abiotic salt stress was imposed by adding 30 mM  
131 NaCl to the micropropagation media, whereas PPV-infected peach shoots (Clemente-  
132 Moreno *et al.*, 2011) were used to assess the biotic stress conditions. Under *in vitro*  
133 conditions, all the assays were performed in the presence or absence of 200  $\mu$ M [ $^{13}$ C]MD  
134 or [ $^{13}$ C]Phe (Campro Scientific GmbH, Germany), as described in Diaz-Vivancos *et al.*  
135 (2017).

136 Under greenhouse conditions, GF305 peach seedlings grown in 2 L pots were first  
137 submitted to an artificial rest period (eight weeks) in a cold chamber to ensure uniformity  
138 and fast growth. The salt-stressed seedlings were then irrigated once a week with 34 mM  
139 NaCl in the presence or absence of 1 mM MD or Phe (Diaz-Vivancos *et al.* 2017) for seven  
140 weeks. The PPV-infected peach seedlings (Hernández *et al.*, 2004) were treated with 1 mM  
141 MD or Phe for six weeks and then submitted to an artificial rest period again, which was  
142 necessary to ensure the later multiplication of the virus. Then, six weeks after the second  
143 artificial rest period, the seedlings were inspected for sharka symptoms and were irrigated  
144 with either 1 mM MD or Phe during these six weeks. For all the conditions, 12 seedlings  
145 were assayed, and another 12 plants were kept as control.

### 146 *Metabolomic analysis*

147 The levels of Phe, MD, amygdalin, benzoic acid and SA were determined in *in vitro*  
148 micropropagated shoots using an Agilent 1290 Infinity UPLC system coupled to a 6550  
149 Accurate-Mass quadrupole TOF mass spectrometer (Agilent Technologies) at the  
150 Metabolomics Platform at CEBAS-CSIC (Murcia, Spain), as previously described (Diaz-  
151 Vivancos *et al.* 2017). The hormone levels (ABA, JA and SA) in the leaves of non-stressed  
152 and stressed GF305 seedlings treated with MD or Phe were determined using a UHPLC-  
153 mass spectrometer (Q-Exactive, ThermoFisher Scientific) at the Plant Hormone  
154 Quantification Platform at IBMCP (Valencia, Spain).

155 ***Enzymatic antioxidant determination***

156 The APX, POX, CAT and SOD activities were assayed as previously described  
157 (Diaz-Vivancos *et al.*, 2008; Diaz-Vivancos *et al.*, 2013; Diaz-Vivancos *et al.*, 2006) in  
158 extracts obtained from *in vitro* shoots and *ex vitro* leaf samples following the extraction  
159 method described in Diaz-Vivancos *et al.* (2017). Protein determination was performed  
160 according to the method of Bradford (Bradford, 1976).

161 ***Gene expression***

162 RNA samples from peach seedling leaves were extracted using a GF1-Total RNA  
163 Extraction Kit (Vivantis) according to the manufacturer's instructions. The expression  
164 levels of the redox-regulated genes *NPRI* (*Non-Expressor of Pathogenesis-Related Gene 1*)  
165 and *TrxH* (*thioredoxin H*), as well as the reference gene *translation elongation factor II*  
166 (*TEF2*) (Tong *et al.*, 2009), were determined by real-time RT-PCR using the GeneAmp  
167 7500 sequence detection system (Applied Biosystems, Foster City, CA, USA) (Faize *et al.*,  
168 2013). The accessions and primer sequences were as follows: *NPRI* (DQ149935; forward  
169 5'-tgcacgagctccttagtca-3'; reverse 5'-cggcttactgcgatcctaag-3'); *TrxH* (AF323593.1;  
170 forward 5'-tggcggagttggctaagaag-3'; 5'-ttcttggcaccacaacctt-3'); and *TEF2* (TC3544;  
171 forward 5'-ggtgtgacgatgaagatgatg-3'; reverse 5'-gaaggagaggaaggtgaaag-3'). Relative  
172 quantification of gene expression was calculated by the Delta-Delta Ct method, and the  
173 expressions of the genes of interest were normalized with the endogenous control *TEF2*.

174 ***Statistical analysis***

175 The data were analyzed by one-way or two-way ANOVA using SPSS 22 software.  
176 Means were separated with Duncan's Multiple Range Test ( $P < 0.05$ ).

177

178

179

180

181

182

## 183 **Results**

### 184 *Effect of salt stress and PPV infection on cyanogenic glycoside turnover and SA* 185 *biosynthesis*

186 In a previous work, we observed that the cyanogenic glycosides (CNgls) pathway  
187 can be involved in a new SA biosynthetic pathway in peach, with MD acting as an  
188 intermediary molecule between both pathways (Diaz-Vivancos *et al.*, 2017). In the current  
189 study, micropropagated NaCl-treated and PPV-infected GF305 shoots were fed with  
190 [<sup>13</sup>C]Phe or with [<sup>13</sup>C]MD. Based in our previous results, the CNgls pathway is fully  
191 functional under our experimental conditions (Diaz-Vivancos *et al.* 2017).

192 In the presence of NaCl, the Phe content decreased in non-treated (control) and MD-  
193 and Phe-treated micropropagated shoots (Fig. 1). Surprisingly, the MD content dropped in  
194 [<sup>13</sup>C]MD-fed shoots subjected to NaCl stress, whereas MD significantly increased in  
195 control and [<sup>13</sup>C]Phe-fed shoots in the presence of NaCl. Salt stress did not have any  
196 discernable effect on amygdalin levels, although the level was lower than that observed in  
197 the absence of NaCl (Fig. 1). Salt stress induced significant benzoic acid (BA) and SA  
198 accumulation in control and [<sup>13</sup>C]Phe-fed shoots, but not in [<sup>13</sup>C]MD-treated shoots, which  
199 maintained SA levels under the stress conditions (Fig. 1).

200 In the biotic stress assay, control and PPV-infected micropropagated shoots were  
201 also fed with [<sup>13</sup>C]Phe or [<sup>13</sup>C]MD. In PPV-infected shoots, there was a significant increase  
202 in amygdalin as well as a significant decrease in MD (Fig. 2). BA levels significantly  
203 increased in non-treated and Phe-treated shoots. As a result, the SA levels rose significantly  
204 in these plants, while MD-treated plants maintained their SA levels (Fig. 2), similar to salt-  
205 stressed shoots (Fig. 1). The SA concentration was significantly higher in MD- than in Phe-  
206 treated shoots, however, as occurred in healthy plants (Fig. 2).

207 We determined the percentage of [<sup>13</sup>C]-labelled compounds from the total content  
208 of Phe, MD and SA in NaCl-stressed and PPV-infected micropropagated peach shoots  
209 treated with either [<sup>13</sup>C]Phe or with [<sup>13</sup>C]MD (Fig. 3). Due to the high sensitivity of the  
210 UPLC-Quadrupole-TOF-MS system used for metabolomics analysis, we detected basal  
211 levels (about 10%) of [<sup>13</sup>C]Phe, [<sup>13</sup>C]MD and [<sup>13</sup>C]SA in control shoots (Fig. 3; Diaz-  
212 Vivancos *et al.* 2017), regardless of the presence of NaCl or PPV.

213 In micropropagated shoots submitted to NaCl stress, nearly 15% of the total SA  
214 quantified appeared as [<sup>13</sup>C]SA after the [<sup>13</sup>C]MD treatment. Regarding the [<sup>13</sup>C]Phe  
215 treatment, nearly 17% of Phe or MD was labelled with [<sup>13</sup>C], and the percentage of  
216 [<sup>13</sup>C]SA was lower than 10% (Fig. 3). In PPV-infected shoots treated with [<sup>13</sup>C]MD, 26%  
217 of the MD and 14% of the SA was [<sup>13</sup>C]-labelled compounds (Fig. 3). However, when  
218 plants were fed with [<sup>13</sup>C]Phe, only 13% of the MD and less than 10% of the SA appeared  
219 as [<sup>13</sup>C]MD and [<sup>13</sup>C]SA, respectively (Fig. 3). Taken together, our results support the  
220 hypothesis that MD can be metabolized to SA in peach plants under abiotic and biotic  
221 stress conditions.

222 We also fed peach seedlings grown in a greenhouse with either MD or Phe, under  
223 both salt stress and PPV infection conditions. It is important to note that the age of the  
224 seedlings used for the biotic stress assays was different than the age of seedlings used for  
225 the abiotic stress experiment. This difference is due to the fact that PPV-infected seedlings  
226 were subjected to an additional artificial rest period in order to ensure later virus  
227 multiplication (see details in the Plant material description). For this reason, the data  
228 obtained from control and treated (MD or Phe) plants in the absence of stress conditions  
229 could vary between batches.

230 The SA levels in peach seedlings were statistically higher in MD-treated plants than  
231 in Phe-treated plants when NaCl was absent (Fig. 4A), which agrees with the data observed  
232 in micropropagated shoots (Fig. 1). Salt stress strongly increased (3-fold) the SA content in  
233 the control seedlings. In the Phe-treated seedlings, NaCl produced a significant increase in  
234 SA, whereas salt stress conditions did not statistically affect the SA levels in MD-treated  
235 seedlings (Fig. 4A). In PPV-infected seedlings, a similar increase (about 1.5-fold) in total  
236 SA content was observed in control and MD- and Phe-treated plants due to the infection  
237 (Fig. 4B).

### 238 *Effect on H<sub>2</sub>O<sub>2</sub>-scavenging and -producing enzymes*

239 Researchers have established that increases in SA content lead to an accumulation  
240 of H<sub>2</sub>O<sub>2</sub> (Durner and Klessig, 1995; Rao *et al.*, 1997). In this study, the effect of MD- and  
241 Phe-treatments under stress conditions on H<sub>2</sub>O<sub>2</sub>-scavenging (APX, POX and CAT) and  
242 H<sub>2</sub>O<sub>2</sub>-producing (SOD) enzymes was analyzed in micropropagated shoots and seedlings. In



243 the absence of stress, the MD treatment produced a rise in CAT and SOD activities in  
244 micropropagated shoots. Meanwhile, Phe increased all the analyzed antioxidant activities in  
245 a similar manner (Tables 1 and 2).

246 When submitted to salt stress, micropropagated shoots showed lower POX activity  
247 than unstressed shoots. Under salt stress conditions, MD-treated shoots displayed a strong  
248 increase in SOD activity, whereas Phe-treated shoots showed increases in both POX and  
249 SOD activities (Table 1).

250 In peach seedlings not submitted to salt stress, the MD treatment decreased all the  
251 H<sub>2</sub>O<sub>2</sub>-scavenging enzymes analyzed, whereas Phe produced a decrease in CAT activity and  
252 a rise in SOD activity (Table 1). In control plants, NaCl stress reduced APX and CAT  
253 activities. Under the stress conditions, the MD treatment increased APX, POX, CAT and  
254 SOD activities; the Phe treatment, on the other hand, reduced SOD activity when compared  
255 to non-stressed, treated seedlings (Table 1).

256 In micropropagated peach shoots, PPV infection produced an increase in POX and  
257 SOD activities (Table 2). In PPV-infected shoots, the MD treatment decreased CAT  
258 activity but increased SOD activity when compared with uninfected shoots. In contrast, the  
259 Phe-treatment reduced APX, POX and CAT activities in relation to non-infected plants  
260 (Table 2).

261 Regarding the PPV assay in peach seedlings, it is important to remember that the  
262 control plants used in this experiment were different from those used in the NaCl stress  
263 experiment. In non-infected plants, both treatments reduced SOD activity in a similar  
264 manner, whereas Phe-treated plants also showed a strong decrease in CAT activity (Table  
265 2). In control seedlings, PPV infection produced a decrease in APX and CAT activity and  
266 an increase in POX activity (Table 2). In MD-treated plants, PPV infection reduced APX,  
267 POX, CAT and SOD activities. In contrast, Phe-treated plants showed a 2-fold increase in  
268 POX and CAT activities, as well as a dramatic increase in SOD activity, and these changes  
269 paralleled a significant decrease in APX activity (4.3-fold) (Table 2).

270

271

272 ***Plant performance under the experimental conditions***

273 As part of this study, we assessed the effect of salt stress and PPV infection, in the  
274 presence or absence of MD and Phe, on plant performance. A growth/development  
275 parameter (number of branches and buds per plant) was determined for NaCl-stressed  
276 seedlings, whereas the presence of sharka symptoms in peach leaves (phenotypic PPV  
277 symptoms score, Diaz-Vivancos et al. 2017) was recorded in PPV-infected seedlings.

278 In the absence of NaCl, MD-treated plants developed less branches and buds than  
279 control and Phe-treated plants (Fig. 5A), although other growth parameters such as height  
280 did not change (data not shown). In non-treated (control) plants, salt stress slightly reduced  
281 the number of branches and buds. A different effect was observed in MD- and Phe-treated  
282 plants. In MD-treated plants, NaCl did not affect the number of branches and buds, whereas  
283 the number significantly decreased in Phe-treated seedlings under salt stress (Figure 5A).  
284 The presence of sharka symptoms in peach leaves was scored for each plant according to a  
285 scale of 0 (no symptoms) to 5 (maximum symptom intensity) (Rubio *et al.*, 2005).  
286 According to the mean intensity of symptoms in the peach leaves, MD- and Phe-treated  
287 seedlings showed a significant decrease in PPV-induced symptoms (Fig. 5B).

288 ***Effect on other stress-related hormones: ABA and JA***

289 We also analyzed the effect of MD and Phe treatments on ABA and JA levels in  
290 peach seedlings submitted to both stress conditions. In the absence of NaCl stress, the ABA  
291 content in leaves was similar in all treatments, whereas JA levels were statistically lower in  
292 MD- and Phe-treated seedlings than in control plants (Fig. 6A). When plants were  
293 submitted to NaCl stress, control and Phe-treated peach plants showed increased ABA and  
294 JA levels. In addition, under these stress conditions, MD- and Phe-treated plants had lower  
295 JA levels than control plants (Fig. 6A).

296 Regarding the non-infected plants used for the biotic stress experiments, the MD  
297 and Phe treatments had no effect on JA or SA levels (Figs. 6B and 4B, respectively).  
298 However, the MD treatment did produce a drop in ABA levels (Fig. 6B). The effect of PPV  
299 infection on these plant hormones was somewhat different from that observed in NaCl-  
300 stressed plants. PPV infection only produced an increase in ABA content in MD-treated

301 plants, whereas JA levels strongly increased in both the MD and Phe treatments, although  
302 the changes were only statistically significant in Phe-treated plants (Fig 6B).

### 303 ***Gene expression of redox-related genes***

304 We also studied the effect of MD and Phe treatments on the Non-Expressor of  
305 Pathogenesis-Related Gene 1 (*NPR1*) and thioredoxin H (*TrxH*) expression levels in peach  
306 seedlings submitted to both stress conditions. *NPR1* is one of the best described redox-  
307 related genes, and its expression is modulated by SA. In addition, thioredoxins (Trx) are  
308 also involved in SA-induced *NPR1* conformational changes (Dong, 2004; Tada *et al.*, 2008;  
309 Vieira Dos Santos and Rey, 2006).

310 The chemical treatments did not produce any significant changes in *NPR1* and *TrxH*  
311 expression in the absence of NaCl, although we observed a slight increase in *TrxH*  
312 expression in Phe-treated seedlings (Fig. 7A). In older plants (control plants used for the  
313 PPV-experiment), however, both treatments increased *TrxH* gene expression, whereas no  
314 changes in *NPR1* expression were observed (Fig. 7B).

315 When salt stress was imposed, MD-treated plants displayed a significant increase in  
316 *TrxH* expression in relation to controls and Phe-treated seedlings, whereas NaCl only  
317 affected the *NPR1* expression (decrease) in Phe-treated plantlets (Fig. 7A). On the other  
318 hand, PPV-infection had no effects on *TrxH* expression, while the Phe treatment induced  
319 greater *NPR1* expression than that found in control plants (Fig 7B).

320

321

### 322 **Discussion**

323 In the present work, we studied whether MD or Phe treatments can affect the  
324 biosynthesis of SA from MD under stress conditions in GF305 peach plants. In a previous  
325 work, we described that the CNgIcs pathway is involved, at least in part, in SA biosynthesis  
326 in peach plants, and that MD acts as an intermediary molecule between SA biosynthesis  
327 and CNgIcs turnover (Diaz-Vivancos *et al.* 2017). It is well known that SA is a signaling  
328 molecule in the plant defense response that can induce tolerance to different abiotic and  
329 biotic stresses (Khan *et al.*, 2015; Rivas-San Vicente and Plasencia, 2011). We selected salt

330 stress and PPV infection as the abiotic and biotic stress conditions, respectively. Different  
331 authors have shown that SA can alleviate NaCl-induced damage. However, this response is  
332 somewhat controversial, and the reported results depend on the plant species and growth  
333 conditions in addition to the SA concentration and application mode (Barba-Espin *et al.*,  
334 2011; Jayakannan *et al.*, 2015; Khan *et al.*, 2015). Regarding biotic stress, GF305 plants are  
335 commonly used for PPV-peach interaction studies, and it has been reported that PPV  
336 infection can induce oxidative stress at the subcellular level in these plants (Diaz-Vivancos  
337 *et al.*, 2006).

338 We previously reported that at least 10% of the total SA content in micropropagated  
339 peach shoots could be due to CNgIcs turnover via MD (Diaz-Vivancos *et al.*, 2017). Under  
340 both stress conditions in the present study, MD treatment did not increase the total SA  
341 content (Figs. 1 and 2), although the presence of [<sup>13</sup>C]MD did increase the level of [<sup>13</sup>C]SA  
342 detected (near 15% of the detected SA was [<sup>13</sup>C]-labelled; Fig. 3), indicating that the  
343 biosynthesis of SA from MD is still functional under stress conditions. Under salt stress  
344 conditions, the increase observed in SA in non-treated (control) and Phe-treated  
345 micropropagated peach shoots correlated with enhanced levels of the SA precursors MD  
346 and BA, whereas in PPV-infected shoots, this correlation only occurred in control shoots.  
347 Taken together, these results suggest that under stress conditions, the bulk of SA must  
348 come from isochorismate (IC) and PAL pathways (Dempsey *et al.*, 2011). Accordingly, it  
349 has been suggested that the PAL pathway is the main route for SA biosynthesis in salt-  
350 stressed rice seedlings (Sawada *et al.*, 2006) and in tobacco mosaic virus (TMV)-infected  
351 *Nicotiana tabacum* plants (Yalpani *et al.*, 1993). In addition, CNgIcs is thought to play a  
352 possible role in unfavorable environmental conditions (Gleadow and Møller, 2014), so MD  
353 therefore potentially plays a role in plant defense responses.

354 When SA levels were analyzed in peach seedlings submitted to salt stress grown in  
355 a greenhouse, we observed a similar response to that observed under *in vitro* conditions.  
356 Furthermore, the SA content increased in both control and Phe-treated plants. NaCl stress  
357 also enhanced ABA and JA levels in the control and Phe-treated plants, but not in the MD-  
358 treated plants. In control seedlings, we observed an increased SA/JA ratio due to salinity,  
359 whereas in MD-treated seedlings, the SA/JA ratio slightly decreased. This response  
360 correlated with the fact that NaCl stress had no effect on the development of MD-treated

361 seedlings. Accordingly, an increase in the SA/JA ratio has been proposed as a marker of  
362 saline stress (Acosta-Motos *et al.*, 2016). ABA is a key modulator of the response to abiotic  
363 stress due to its important role in stomatal regulation. In addition, JA seems to act as a  
364 regulator of ABA biosynthesis (de Ollas and Dodd, 2016). Under saline conditions, we  
365 observed an increase in ABA levels in control and Phe-treated plants that correlated with a  
366 significant rise in JA. However, JA data should be considered with caution because JA  
367 seems to act very early in the response to stress (de Ollas and Dodd, 2016), whereas we  
368 analyzed its levels at the end of the NaCl stress period.

369         Regarding PPV-infected peach seedlings, severe symptoms were observed in non-  
370 treated plants, including venal chlorosis and leaf deformation. The mean intensity of PPV  
371 symptoms observed in non-treated plants, around 3.0 on a scale of 0 to 5, confirmed the  
372 high susceptibility described for this cultivar (Hernández *et al.*, 2004). Both MD and Phe  
373 treatments reduced the severity of symptoms, although Phe did so to a lesser extent than  
374 MD. This response correlated with higher levels of SA and JA in peach leaves, as well as  
375 with enhanced ABA levels in MD-treated seedlings. Accordingly, both SA and JA have  
376 been found to be necessary for systemic resistance to TMV in *N. bentamiana* plants (Zhu *et*  
377 *al.*, 2014). These authors reported increased susceptibility to TMV in plants with impaired  
378 SA (no effect on JA levels) or JA (SA accumulation failure) pathways. On the other hand,  
379 ABA has been suggested to regulate plant defense responses in the early stages of pathogen  
380 infection via stomatal closure or the induction of callose deposition (Alazem and Lin,  
381 2015). Although it is accepted that SA and ABA play antagonistic roles in plants, a  
382 simultaneous increase of ABA and SA due to *Bamboo mosaic virus* or *Cucumber mosaic*  
383 *virus* infection has also been reported (Alazem *et al.*, 2014). Moreover, in the *Arabidopsis*  
384 mutant *vtc1* (ascorbic acid-deficient mutant), the induction of ABA and SA correlated with  
385 tolerance to two different types of pathogens (Barth *et al.*, 2004).

386         In the present study, the correlation observed between SA levels and H<sub>2</sub>O<sub>2</sub> content  
387 during environmental stress conditions could be explained by the “self-amplifying feedback  
388 loop” concept (Jayakannan *et al.*, 2015), in which SA increases H<sub>2</sub>O<sub>2</sub> levels and H<sub>2</sub>O<sub>2</sub>  
389 induces SA accumulation (Dempsey and Klessig, 1995; Durner and Klessig, 1995; Rao *et*  
390 *al.*, 1997). In MD-treated micropropagated peach shoots that were not subjected to stress,  
391 the increase in SA levels correlated with decreased APX and increased SOD activities. In

392 the salinity assay, the accumulation of SA via MD in the non-NaCl-treated seedlings was  
393 associated with a decrease in H<sub>2</sub>O<sub>2</sub>-scavenging enzymes (APX, POX and CAT). In non-  
394 stressed peach seedlings, the accumulation of SA via MD in the salinity assay was  
395 associated with a decrease in H<sub>2</sub>O<sub>2</sub>-scavenging enzymes (APX, POX and CAT). However,  
396 this effect was not observed in older seedlings (those used as control plants in biotic stress  
397 experiments).

398 Under salinity, the MD treatment produced the best response in terms of stress  
399 tolerance under *in vitro* (Diaz-Vivancos *et al.*, 2017) and *ex vitro* (Fig. 5A) conditions. A  
400 strong increase in SOD activity due to the combination of MD and NaCl was recorded in  
401 both growth conditions, favoring better control of the O<sub>2</sub><sup>-</sup> generated under the salinity  
402 conditions. This response was accompanied by increases in APX and POX in peach  
403 seedlings, probably to overcome the H<sub>2</sub>O<sub>2</sub> production by SOD. The modulation of  
404 antioxidant enzymes such as APX, POX and SOD in SA-mediated abiotic stress tolerance  
405 has been widely described in the literature (Khan *et al.*, 2015). Some authors have  
406 attributed salt tolerance to higher constitutive levels of some antioxidant enzymes, whereas  
407 other authors have found that the coordinated up-regulation of the antioxidative enzymes  
408 activities seems to be one of the mechanisms involved in the salt-tolerance response  
409 (Acosta-Motos *et al.*, 2017; Hernandez *et al.*, 2001; Lopez-Gomez *et al.*, 2007).

410 In PPV-infected micropropagated peach shoots, no correlation between H<sub>2</sub>O<sub>2</sub>-  
411 related antioxidant activities and SA levels was found in control and Phe-treated shoots.  
412 Nevertheless, the PPV-infected shoots treated with MD displayed low CAT and high SOD  
413 activity. In PPV-infected peach seedlings, it was difficult to find any SA/antioxidant  
414 enzyme correlation. One of the most interesting results was the strong APX inhibition in  
415 Phe-treated plants. However, these plants had the highest level of SOD activity, and they  
416 also displayed the highest CAT and POX activity levels, as a compensatory mechanism to  
417 eliminate H<sub>2</sub>O<sub>2</sub>. Under our experimental conditions, both treatments (MD and Phe) reduced  
418 PPV symptoms in peach leaves thorough a mechanism that seems to be independent of  
419 antioxidative metabolism and reactive oxygen species production. This mechanism includes  
420 the interaction of SA with other plant hormones such as ABA and JA. It has been reported  
421 that the over-expression of SA biosynthesis genes as well as the exogenous application of  
422 SA or its analogues modulate different signaling pathways, enhancing plant responses to

423 different viruses, including PPV (Alazem and Lin, 2015; Clemente-Moreno *et al.*, 2010;  
424 Clemente-Moreno *et al.*, 2012).

425 NPR1 is a key regulator of the SA-mediated stress responses in plants. While the  
426 implication of NPR1 in plant-pathogen interactions is well known, its role during salt stress  
427 remains controversial, and induced a strong increase in SA content in control seedlings. In  
428 Phe-treated seedlings, the salt tolerance response in plants could be associated with both  
429 NPR1-independent and NPR1-dependent mechanisms (Jayakannan *et al.*, 2015). In control  
430 and MD-treated peach seedlings submitted to salt stress, the *NPR1* gene expression did not  
431 change, even though NaCl however, *NPR1* gene expression decreased. In a similar manner,  
432 in PPV-infected seedlings, only the Phe treatment affected the expression of *NPR1*. In  
433 agreement with these results, the expression of the *NPR1* gene was not altered in  
434 micropropagated peach shoots treated with benzothiadiazole (an SA analog) (Clemente-  
435 Moreno *et al.*, 2012). Other authors have suggested that the WHIRLY1 protein is able to  
436 perceive redox changes and is then translocated to the nucleus-triggering defense responses.  
437 This analogous mechanism to NPR1 could act as an NPR1-independent signaling pathway  
438 (Foyer *et al.*, 2014). Nevertheless, NPR1 might be also regulated at the protein level, and  
439 the protein conformation may be sensitive to cellular redox changes (Dong, 2004). In this  
440 regards, the redox stress induced by salinity and/or PPV-infection could facilitate the  
441 release of NPR1 monomers and their entry into the nuclei (Durner and Klessig, 1995).  
442 Moreover, we have previously suggested that an oxidized environment due to MD  
443 treatment in the absence of stress could also modify the function of proteins such as NPR1  
444 (Diaz-Vivancos *et al.*, 2017).

445 Plant thioredoxins (Trx) play an essential role in protecting plants from oxidative  
446 damage. They can modulate antioxidant mechanisms regulating the redox status of target  
447 proteins as well as gene expression, including the expression of *NPR1* (Vieira Dos Santos  
448 and Rey, 2006). Trx-h3 and Trx-h5 can interact with NPR1 and reduce its oligomerization,  
449 an interaction that increases under SA treatments or pathogen infections (Tada *et al.*, 2008).  
450 Under salt stress conditions, MD was the only treatment that induced *TrxH* gene  
451 expression. MD treatment also produced higher *NPR1* expression levels than Phe treatment,  
452 suggesting the role of TrxH in activating NPR1 monomerization as well as in enabling the  
453 activation of defense mechanisms to deal with the saline stress. However, in PPV-infected

454 peach seedlings, no changes in *TrxH* expression were observed in any treatment. In non-  
455 infected peach plants, both MD and Phe treatments induced *TrxH* gene expression and a  
456 slight concomitant increase in *NPR1* expression (Diaz-Vivancos *et al.*, 2017).

457         As a conclusion, based on our previous results suggesting that the CNglS pathway  
458 can be involved in SA biosynthesis via MD, we have found evidence that this new SA  
459 biosynthetic pathway also works also under stress conditions. The contribution of this  
460 pathway to the SA pool does not seem to be relevant, however, under salt stress or PPV-  
461 infection conditions. The physiological functions of this new SA biosynthetic pathway thus  
462 remain to be elucidated in further studies. In addition, we have shown that the role of SA is  
463 not limited to biotic stress responses, but that it also plays a role in the response to abiotic  
464 stress in peach.

465

466

467

## 468 **Acknowledgments**

469 This work was supported by the Spanish Ministry of Economy and Competitiveness  
470 (Project AGL2014-52563-R). PDV and CP thank CSIC and UPCT, respectively, as well as  
471 the Spanish Ministry of Economy and Competitiveness for their ‘Ramon & Cajal’ research  
472 contract, co-financed by FEDER funds.

473

474

475

476

477

478

479

480

481



## 482 **References**

- 483 **Acosta-Motos J, Ortuño M, Bernal-Vicente A, Diaz-Vivancos P, Sanchez-Blanco M, Hernandez J.**  
484 2017. Plant Responses to Salt Stress: Adaptive Mechanisms. *Agronomy* **7**, 18.
- 485 **Acosta-Motos JR, Ortuño MF, Álvarez S, López-Climent MF, Gómez-Cadenas A, Sánchez-Blanco**  
486 **MJ.** 2016. Changes in growth, physiological parameters and the hormonal status of *Myrtus*  
487 *communis* L. plants irrigated with water with different chemical compositions. *Journal of Plant*  
488 *Physiology* **191**, 12-21.
- 489 **Alazem M, Lin K-Y, Lin N-S.** 2014. The Abscisic Acid Pathway Has Multifaceted Effects on the  
490 Accumulation of Bamboo mosaic virus. *Molecular Plant-Microbe Interactions* **27**, 177-189.
- 491 **Alazem M, Lin N-S.** 2015. Roles of plant hormones in the regulation of host-virus interactions.  
492 *Molecular Plant Pathology* **16**, 529-540.
- 493 **Barba-Espin G, Clemente-Moreno MJ, Alvarez S, Garcia-Legaz MF, Hernandez JA, Diaz-Vivancos**  
494 **P.** 2011. Salicylic acid negatively affects the response to salt stress in pea plants. *Plant Biology*  
495 **13**, 909-917.
- 496 **Barth C, Moeder W, Klessig DF, Conklin PL.** 2004. The Timing of Senescence and Response to  
497 Pathogens Is Altered in the Ascorbate-Deficient Arabidopsis Mutant vitamin c-1. *Plant*  
498 *Physiology* **134**, 1784-1792.
- 499 **Bradford MM.** 1976. A rapid and sensitive method for the quantitation of microgram quantities of  
500 protein utilizing the principle of protein-dye binding. *Analytical Biochemistry* **72**, 248-254.
- 501 **Catinot J, Buchala A, Abou-Mansour E, Metraux JP.** 2008. Salicylic acid production in response to  
502 biotic and abiotic stress depends on isochlorismate in *Nicotiana benthamiana*. *FEBS Letters* **582**,  
503 473-478.
- 504 **Clemente-Moreno MJ, Diaz-Vivancos P, Barba-Espin G, Hernandez JA.** 2010. Benzothiadiazole  
505 and l-2-oxothiazolidine-4-carboxylic acid reduce the severity of Sharka symptoms in pea leaves:  
506 effect on antioxidative metabolism at the subcellular level. *Plant Biology* **12**, 88-97.
- 507 **Clemente-Moreno MJ, Diaz-Vivancos P, Piqueras A, Antonio Hernandez J.** 2012. Plant growth  
508 stimulation in *Prunus* species plantlets by BTH or OTC treatments under in vitro conditions.  
509 *Journal of Plant Physiology* **169**, 1074-1083.
- 510 **Clemente-Moreno MJ, Piqueras A, Hernández JA.** 2011. Implication of peroxidase activity in  
511 development of healthy and PPV-infected micropropagated GF305 peach plants. *Plant Growth*  
512 *Regulation* **65**, 359-367.
- 513 **Chen Z, Zheng Z, Huang J, Lai Z, Fan B.** 2009. Biosynthesis of salicylic acid in plants. *Plant Signaling*  
514 *& Behavior* **4**, 493-496.
- 515 **de Ollas C, Dodd IC.** 2016. Physiological impacts of ABA-JA interactions under water-limitation.  
516 *Plant Molecular Biology* **91**, 641-650.

- 517 **Decroocq V, Foulongne M, Lambert P, Gall OL, Mantin C, Pascal T, Schurdi-Levraud V, Kervella J.**  
518 2005. Analogues of virus resistance genes map to QTLs for resistance to sharka disease in  
519 *Prunus davidiana*. *Molecular Genetics and Genomics* **272**, 680-689.
- 520 **Dempsey DA, Klessig DF.** 1995. Signals in plant disease resistance. *Bulletin de l'Institut Pasteur* **93**,  
521 167-186.
- 522 **Dempsey DMA, Vlot AC, Wildermuth MC, Klessig DF.** 2011. Salicylic Acid Biosynthesis and  
523 Metabolism. *The Arabidopsis Book*, e0156.
- 524 **Diaz-Vivancos P, Bernal-Vicente A, Cantabella D, Petri C, Hernández JA.** 2017. Metabolomic and  
525 Biochemical Approaches Link Salicylic Acid Biosynthesis to Cyanogenesis in Peach Plants. *Plant*  
526 *and Cell Physiology* doi: 10.1093/pcp/pcx135
- 527 **Diaz-Vivancos P, Clemente-Moreno MJ, Rubio M, Olmos E, Garcia JA, Martinez-Gomez P,**  
528 **Hernandez JA.** 2008. Alteration in the chloroplastic metabolism leads to ROS accumulation in  
529 pea plants in response to plum pox virus. *Journal of Experimental Botany* **59**, 2147-2160.
- 530 **Diaz-Vivancos P, Faize M, Barba-Espin G, Faize L, Petri C, Hernández JA, Burgos L.** 2013. Ectopic  
531 expression of cytosolic superoxide dismutase and ascorbate peroxidase leads to salt stress  
532 tolerance in transgenic plums. *Plant Biotechnology Journal* **11** 976-985.
- 533 **Diaz-Vivancos P, Rubio M, Mesonero V, Periago PM, Barcelo AR, Martinez-Gomez P, Hernandez**  
534 **JA.** 2006. The apoplasmic antioxidant system in *Prunus*: response to long-term plum pox virus  
535 infection. *Journal of Experimental Botany* **57**, 3813-3824.
- 536 **Dong X.** 2004. NPR1, all things considered. *Current Opinion in Plant Biology* **7**, 547-552.
- 537 **Durner J, Klessig DF.** 1995. Inhibition of ascorbate peroxidase by salicylic acid and 2,6-  
538 dichloroisonicotinic acid, two inducers of plant defense responses. *Proceedings of the National*  
539 *Academy of Sciences of the United States of America* **92**, 11312-11316.
- 540 **Faize M, Faize L, Petri C, Barba-Espin G, Diaz-Vivancos P, Clemente-Moreno MJ, Koussa T, Rifai**  
541 **LA, Burgos L, Hernandez JA.** 2013. Cu/Zn superoxide dismutase and ascorbate peroxidase  
542 enhance in vitro shoot multiplication in transgenic plum. *Journal of Plant Physiology* **170**, 625-  
543 632.
- 544 **Foyer CH, Karpinska B, Krupinska K.** 2014. The functions of WHIRLY1 and REDOX-RESPONSIVE  
545 TRANSCRIPTION FACTOR 1 in cross tolerance responses in plants: a hypothesis. *Philosophical*  
546 *Transactions of the Royal Society B: Biological Sciences* **369**.
- 547 **Foyer CH, Noctor G.** 2005. Redox homeostasis and antioxidant signaling: a metabolic interface  
548 between stress perception and physiological responses. *Plant Cell* **17**, 1866-1875.
- 549 **Gleadow RM, Møller BL.** 2014. Cyanogenic Glycosides: Synthesis, Physiology, and Phenotypic  
550 Plasticity. *Annual Review of Plant Biology* **65**, 155-185.
- 551 **Hernandez JA, Diaz-Vivancos P, Rubio M, Olmos E, Ros-Barcelo A, Martinez-Gomez P.** 2006.  
552 Long-term plum pox virus infection produces an oxidative stress in a susceptible apricot, *Prunus*  
553 *armeniaca*, cultivar but not in a resistant cultivar. *Physiologia Plantarum* **126**, 140-152.

- 554 **Hernandez JA, Ferrer MA, Jimenez A, Barcelo AR, Sevilla F.** 2001. Antioxidant systems and O<sub>2</sub>(.-  
555 )/H<sub>2</sub>O<sub>2</sub> production in the apoplast of pea leaves. Its relation with salt-induced necrotic  
556 lesions in minor veins. *Plant Physiol* **127**, 817-831.
- 557 **Hernández JA, Rubio M, Olmos E, Ros-Barceló A, Martínez-Gómez P.** 2004. Oxidative stress  
558 induced by long-term plum pox virus infection in peach (*Prunus persica*). *Physiologia Plantarum*  
559 **122**, 486-495.
- 560 **Jayakannan M, Bose J, Babourina O, Rengel Z, Shabala S.** 2015. Salicylic acid in plant salinity stress  
561 signalling and tolerance. *Plant Growth Regulation* **76**, 25-40.
- 562 **Khan MI, Fatma M, Per TS, Anjum NA, Khan NA.** 2015. Salicylic acid-induced abiotic stress  
563 tolerance and underlying mechanisms in plants. *Frontiers in Plant Science* **6**, 462.
- 564 **Liu X, Rockett KS, Kørner CJ, Pajerowska-Mukhtar KM.** 2015. Salicylic acid signalling: new insights  
565 and prospects at a quarter-century milestone. *Essays In Biochemistry* **58**, 101-113.
- 566 **Lopez-Gomez E, San Juan MA, Diaz-Vivancos P, Beneyto JM, Garcia-Legaz MF, Hernandez JA.**  
567 2007. Effect of rootstocks grafting and boron on the antioxidant systems and salinity tolerance  
568 of loquat plants (*Eriobotrya japonica* Lindl.). *Environmental and Experimental Botany* **60**, 151-  
569 158.
- 570 **Miura K, Tada Y.** 2014. Regulation of water, salinity, and cold stress responses by salicylic acid.  
571 *Frontiers in Plant Science* **5**, 4.
- 572 **Ogawa D, Nakajima N, Seo S, Mitsuahara I, Kamada H, Ohashi Y.** 2006. The phenylalanine pathway  
573 is the main route of salicylic acid biosynthesis in *Tobacco mosaic virus*-infected tobacco leaves.  
574 *Plant Biotechnology* **23**, 395-398.
- 575 **Rao MV, Paliyath G, Ormrod DP, Murr DP, Watkins CB.** 1997. Influence of salicylic acid on H<sub>2</sub>O<sub>2</sub>  
576 production, oxidative stress, and H<sub>2</sub>O<sub>2</sub>-metabolizing enzymes. Salicylic acid-mediated oxidative  
577 damage requires H<sub>2</sub>O<sub>2</sub>. *Plant Physiology* **115**, 137-149.
- 578 **Rivas-San Vicente M, Plasencia J.** 2011. Salicylic acid beyond defence: its role in plant growth and  
579 development. *Journal of Experimental Botany* **62**, 3321-3338.
- 580 **Rubio M, Martínez-Gómez P, Pinochet J, Dicenta F.** 2005. Evaluation of resistance to sharka (Plum  
581 pox virus) of several *Prunus* rootstocks. *Plant Breeding* **124**, 67-70.
- 582 **Sawada H, Shim I-S, Usui K.** 2006. Induction of benzoic acid 2-hydroxylase and salicylic acid  
583 biosynthesis—Modulation by salt stress in rice seedlings. *Plant Science* **171**, 263-270.
- 584 **Tada Y, Spoel SH, Pajerowska-Mukhtar K, Mou Z, Song J, Wang C, Zuo J, Dong X.** 2008. Plant  
585 Immunity Requires Conformational Changes of NPR1 via S-Nitrosylation and Thioredoxins.  
586 *Science* **321**, 952-956.
- 587 **Tong Z, Gao Z, Wang F, Zhou J, Zhang Z.** 2009. Selection of reliable reference genes for gene  
588 expression studies in peach using real-time PCR. *BMC Molecular Biology* **10**, 71.

589 **Vieira Dos Santos C, Rey P.** 2006. Plant thioredoxins are key actors in the oxidative stress  
590 response. *Trends in Plant Science* **11**, 329-334.

591 **Yalpani N, Leon J, Lawton MA, Raskin I.** 1993. Pathway of Salicylic Acid Biosynthesis in Healthy  
592 and Virus-Inoculated Tobacco. *Plant Physiology* **103**, 315-321.

593 **Zhu F, Xi DH, Yuan S, Xu F, Zhang DW, Lin HH.** 2014. Salicylic acid and jasmonic acid are essential  
594 for systemic resistance against tobacco mosaic virus in *Nicotiana benthamiana*. *Molecular Plant*  
595 *Microbe Interaction* **27**, 567-577.

596

597

598

599

600

601

602

603

604

605

606

607

608

609

610

611

612

613

614

615

616

617

618

619

620 **Tables**

621 **Table 1.** Effect of salt stress on APX, POX, CAT, and SOD activities on control and MD-  
 622 and Phe-treated GF305 peach *in vitro* shoots and seedlings. APX is expressed as nmol min<sup>-1</sup>  
 623 mg<sup>-1</sup> protein. POX and CAT are expressed as μmol min<sup>-1</sup> mg<sup>-1</sup> protein. SOD as U mg<sup>-1</sup>  
 624 protein. Data represent the mean ± SE of at least four repetitions. Different letters in the  
 625 same column indicate significant differences according to Duncan's test (P≤0.05).

| <i>In vitro</i> shoots | Treatment | APX           | POX             | CAT         | SOD          |
|------------------------|-----------|---------------|-----------------|-------------|--------------|
| - NaCl                 | Control   | 316.0±48.0 b  | 1453.8±22.4 cd  | 4.1±0.1 b   | 36.2±2.5 d   |
|                        | MD        | 257.0±32.7 b  | 1600.4±231.0 bc | 7.2±1.1 a   | 57.8±8.1 bc  |
|                        | Phe       | 490.9±35.9 a  | 1935.9±78.6 ab  | 6.5±0.4 a   | 56.0±3.4 bcd |
| + NaCl                 | Control   | 253.9±26.1 b  | 891.2±173.0 e   | 2.4±0.1 bc  | 40.6±8.3 cd  |
|                        | MD        | 247.3±27.3 b  | 1101.9±107.6 de | 2.9±0.5 bc  | 81.7±9.1 a   |
|                        | Phe       | 448.6±42.9 a  | 2175.5±48.7 a   | 2.1±0.4 c   | 66.8±3.7 ab  |
| Seedlings              | Treatment | APX           | POX             | CAT         | SOD          |
| - NaCl                 | Control   | 344.9±64.6 a  | 1291.8±136.9 b  | 96.1±6.8 a  | 119.1±17.1 b |
|                        | MD        | 198.2±15.7 b  | 969.1±20.3 c    | 53.25±2.2 d | 107.9±4.9 b  |
|                        | Phe       | 403.6±22.1 a  | 1323.7±53.0 ab  | 70.4±1.9 bc | 198.3±12.9 a |
| + NaCl                 | Control   | 213.84±33.0 b | 1378.7±167.6 ab | 73.5±1.2 bc | 127.2±14.8 b |
|                        | MD        | 371.9±13.8a   | 1603.4±37.3 a   | 78.1±1.8 b  | 230.5±5.1a   |
|                        | Phe       | 356.1±34.8a   | 1361.8±46.1 ab  | 66.5±0.8 c  | 139.0±21.0 b |

626

627

628

629

630

631

632

633

634

635 **Table 2.** Effect of PPV infection on APX, POX, CAT, and SOD activities on control and  
 636 MD- and Phe-treated GF305 peach *in vitro* shoots and seedlings. APX is expressed as nmol  
 637 min<sup>-1</sup> mg<sup>-1</sup> protein. POX and CAT are expressed as μmol min<sup>-1</sup> mg<sup>-1</sup> protein. SOD as U mg<sup>-1</sup>  
 638 protein. Data represent the mean ± SE of at least four repetitions. Different letters in the  
 639 same column indicate significant differences according to Duncan's test (P≤0.05).

| <i>In vitro</i><br>shoots | Treatment | APX            | POX             | CAT         | SOD           |
|---------------------------|-----------|----------------|-----------------|-------------|---------------|
| - PPV                     | Control   | 316.0±48.0 b   | 1453.8±22.4 c   | 4.1±0.1 b   | 36.2±2.5 c    |
|                           | MD        | 257.0 ± 32.7 b | 1600.4±231.0 bc | 7.2±1.1 a   | 57.8±8.1 bc   |
|                           | Phe       | 490.9±35.9 a   | 1935.9±78.6 ab  | 6.5±0.4 a   | 56.0±3.4 bcd  |
| + PPV                     | Control   | 312.7±22.6 b   | 2133.4±138.1 a  | 3.6±0.3 b   | 67.3±4.3 ab   |
|                           | MD        | 373.9 ± 41.3 b | 1890.9±177.2 ab | 2.7 ± 0.1 b | 80.8 ± 11.9 a |
|                           | Phe       | 323.9 ± 28.8 b | 1028.8 ± 43.1 d | 4.1 ± 0.4 b | 35.9 ± 1.9 c  |
| Seedlings                 | Treatment | APX            | POX             | CAT         | SOD           |
| - PPV                     | Control   | 965.2±30.6 a   | 776.5±56.4 cd   | 22.8±0.5 a  | 556.5±11.9 b  |
|                           | MD        | 1052.1±77.2 a  | 959.7±42.9 c    | 24.7±0.3 a  | 257.8±19.5 c  |
|                           | Phe       | 1009.3±45.5 a  | 776.7±35.4 cd   | 9.8±0.3 d   | 257.8±22.8 c  |
| + PPV                     | Control   | 937.8±32.9 b   | 1158.2±105.8 b  | 12.7±1.5 cd | 480.0±45.5 b  |
|                           | MD        | 823.3±12.4 b   | 622.4±4.4 d     | 16.8±1.4 bc | 133.0±22.1 d  |
|                           | Phe       | 235.1±14.4 c   | 1616.6±60.9 a   | 20.5±1.8 ab | 1125.8±57.9 a |

640

641

642

643

644

645

646

647

648

649

650 **Figure legends.**

651 **Figure 1.** Salicylic acid (SA) biosynthetic and cyanogenic glucosides (CNglcs) pathways in  
652 salt-stressed peach shoots micropropagated in the presence or absence of [<sup>13</sup>C]MD or  
653 [<sup>13</sup>C]Phe. Total levels ( $\mu\text{M g}^{-1}$  FW) of amygdalin, benzoic acid, mandelonitrile,  
654 phenylalanine and SA are shown. Data represent the mean  $\pm$  SE of at least 12 repetitions of  
655 each treatment. Different letters indicate significant differences in each graph according to  
656 Duncan's test ( $P \leq 0.05$ ). Blue arrows indicate the previously described SA biosynthesis in  
657 plants (dot arrow, putative), whereas red arrows show the new pathway suggested for peach  
658 plants.

659 **Figure 2.** Salicylic acid (SA) biosynthetic and cyanogenic glucosides (CNglcs) pathways in  
660 PPV-infected peach shoots micropropagated in the presence or absence of [<sup>13</sup>C]MD or  
661 [<sup>13</sup>C]Phe. Total levels ( $\mu\text{M g}^{-1}$  FW) of amygdalin, benzoic acid, mandelonitrile,  
662 phenylalanine and SA are shown. Data represent the mean  $\pm$  SE of at least 12 repetitions of  
663 each treatment. Different letters indicate significant differences in each graph according to  
664 Duncan's test ( $P \leq 0.05$ ). Blue arrows indicate the previously described SA biosynthesis in  
665 plants (dot arrow, putative), whereas red arrows show the new pathway suggested for peach  
666 plants.

667 **Figure 3.** Percentage (from the total amount detected) of [<sup>13</sup>C]- phenylalanine,  
668 mandelonitrile and salicylic acid in non-stressed, NaCl-stressed and PPV-infected peach  
669 shoots micropropagated in the presence or absence of [<sup>13</sup>C]MD or [<sup>13</sup>C]Phe. Under control  
670 conditions, approximately 10% [<sup>13</sup>C]- mandelonitrile, phenylalanine and salicylic acid were  
671 observed (Diaz-Vivancos et al. 2017). Data represent the mean of at least 15 repetitions of  
672 each treatment.

673 **Figure 4.** Total SA level ( $\text{ng g}^{-1}$  DW) in the leaves of peach seedlings grown in the  
674 presence or absence of MD or Phe submitted to 34 mM NaCl (A) or PPV infection (B).  
675 Data represent the mean  $\pm$  SE of at least five repetitions of each treatment. Different letters  
676 indicate significant differences according to Duncan's test ( $P \leq 0.05$ ).

677

678 **Figure 5.** Effect on plant performance. The effect of chemical treatments and salt stress on  
679 peach seedlings was assessed by the determination of the number of branches and buds per  
680 plant (A). In (B), the phenotypic scoring for evaluating the resistance/susceptibility to PPV  
681 infection (Decroocq *et al.*, 2005) and sharka symptoms in peach seedlings is shown. Data  
682 represent the mean  $\pm$  SE of at least 10 repetitions. Different letters indicate significant  
683 differences according to Duncan's test ( $P \leq 0.05$ ).

684 **Figure 6.** Effect on the stress-related hormones ABA and JA. Total ABA and JA levels (ng  
685  $g^{-1}$  DW) in the leaves of peach seedlings grown in the presence or absence of MD or Phe  
686 submitted to 34 mM NaCl (A) or PPV infection (B). Data represent the mean  $\pm$  SE of at  
687 least 5 repetitions of each treatment. Different letters indicate significant differences  
688 according to Duncan's test ( $P \leq 0.05$ ).

689 **Figure 7.** Gene expression of *TrxH* and *NPR1* in the leaves of peach seedlings grown in the  
690 presence or absence of MD or Phe submitted to 34 mM NaCl (A) or PPV infection (B).  
691 Data represent the mean  $\pm$  SE of at least five repetitions of each treatment. Different letters  
692 indicate significant differences in each graph according to Duncan's test ( $P \leq 0.05$ ).

693

694

695

696

697

698

699

700

701

702

703

704



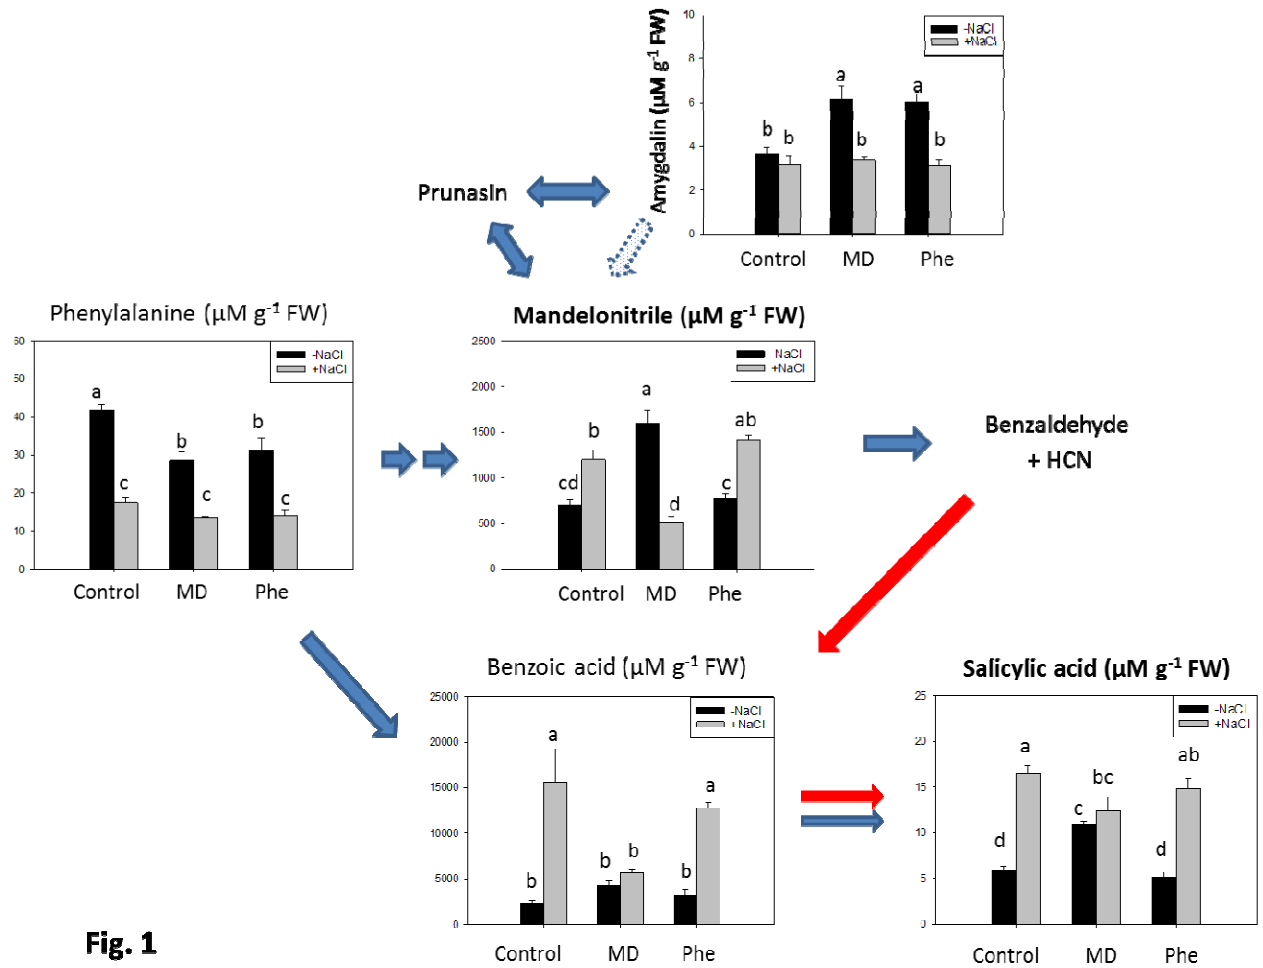

**Fig. 1**

705

706

707

708

709

710

711

712

713

714

715

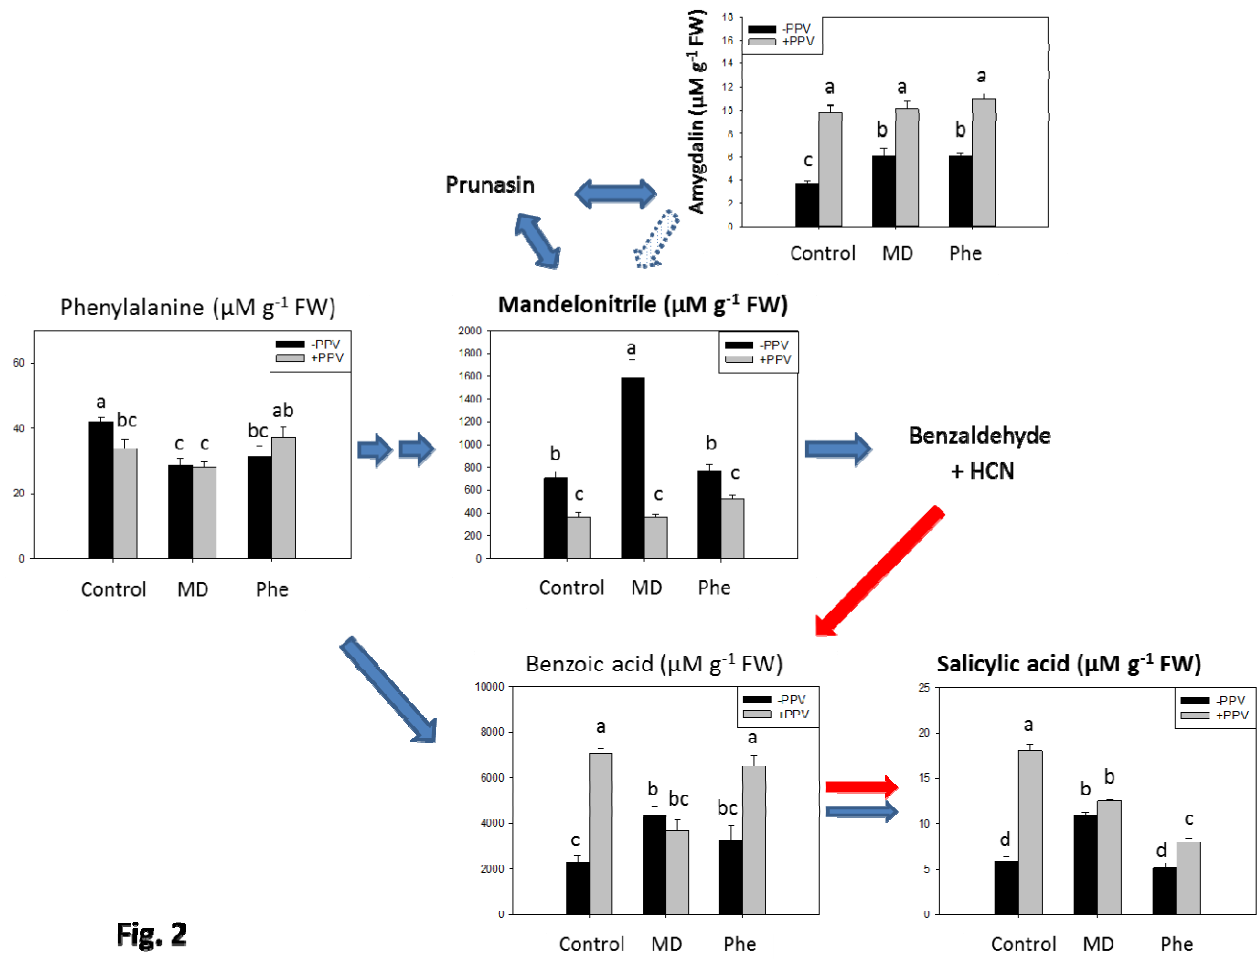

**Fig. 2**

716

717

718

719

720

721

722

723

724

725

726

727

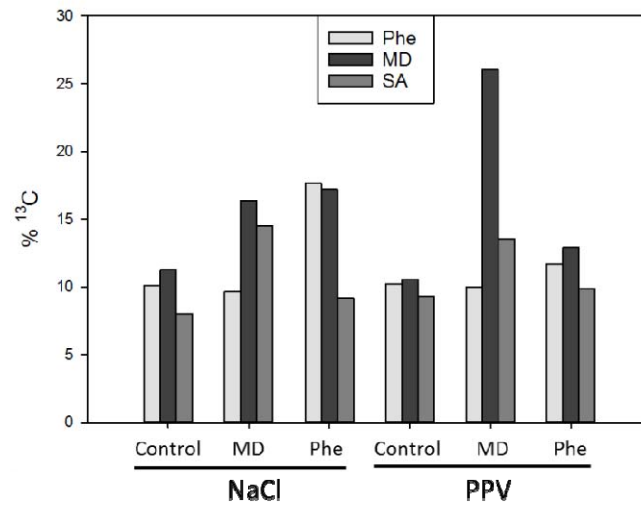

**Fig. 3**

728

729

730

731

732

733

734

735

736

737

738

739

740

741

742

743

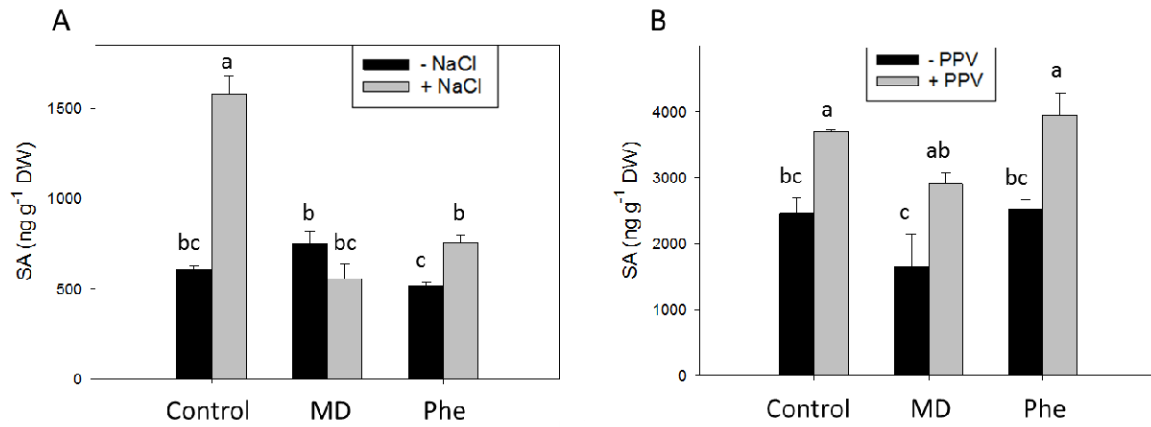

**Fig. 4**

744

745

746

747

748

749

750

751

752

753

754

755

756

757

758

759

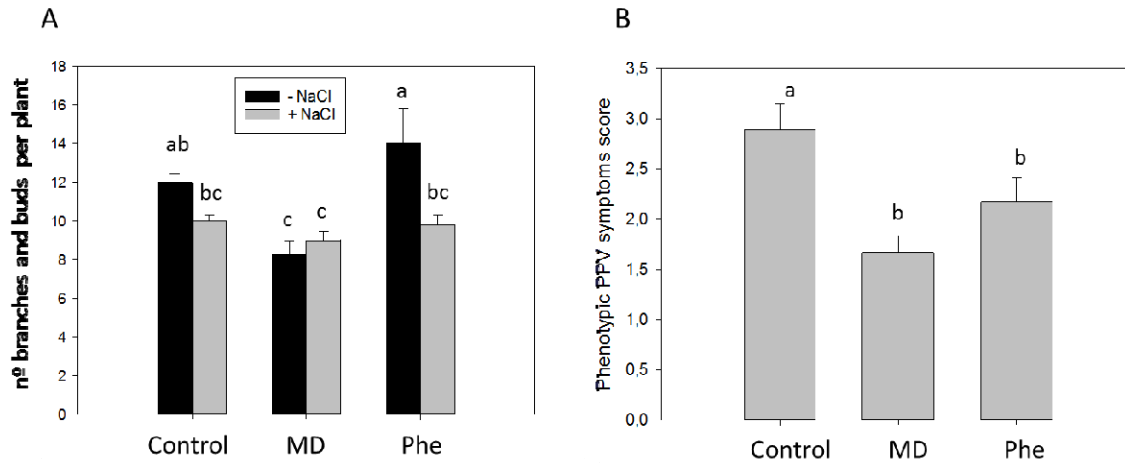

**Fig. 5**

760

761

762

763

764

765

766

767

768

769

770

771

772

773

774

775

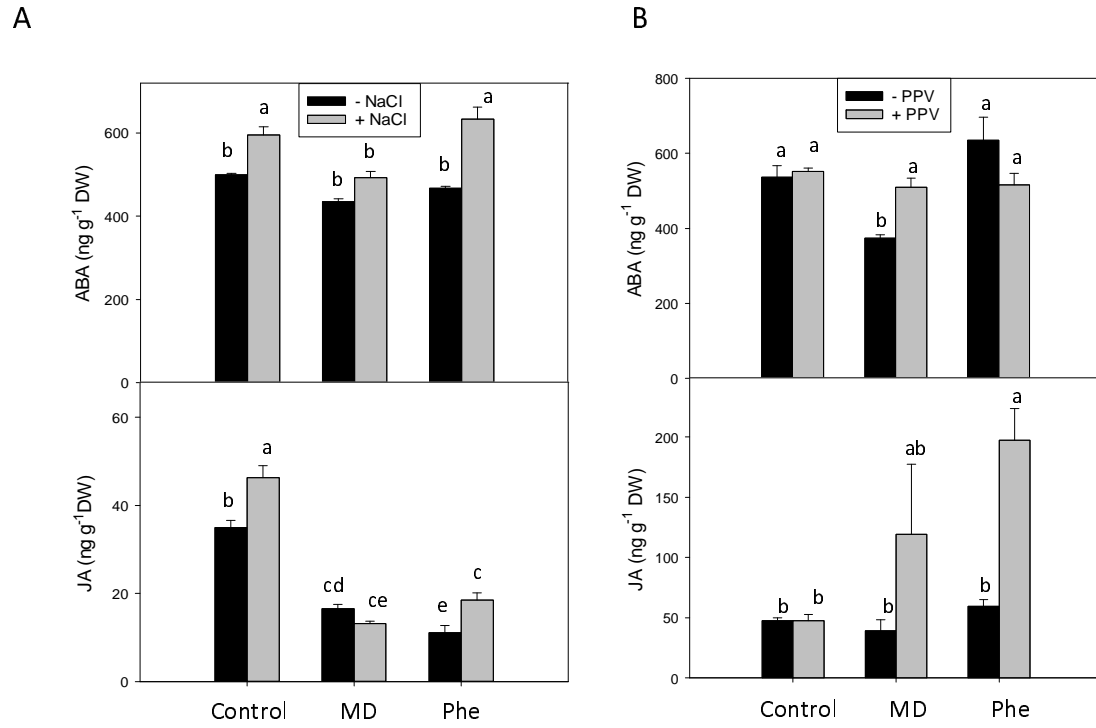

**Fig. 6**

776

777

778

779

780

781

782

783

784

785

786

787

788

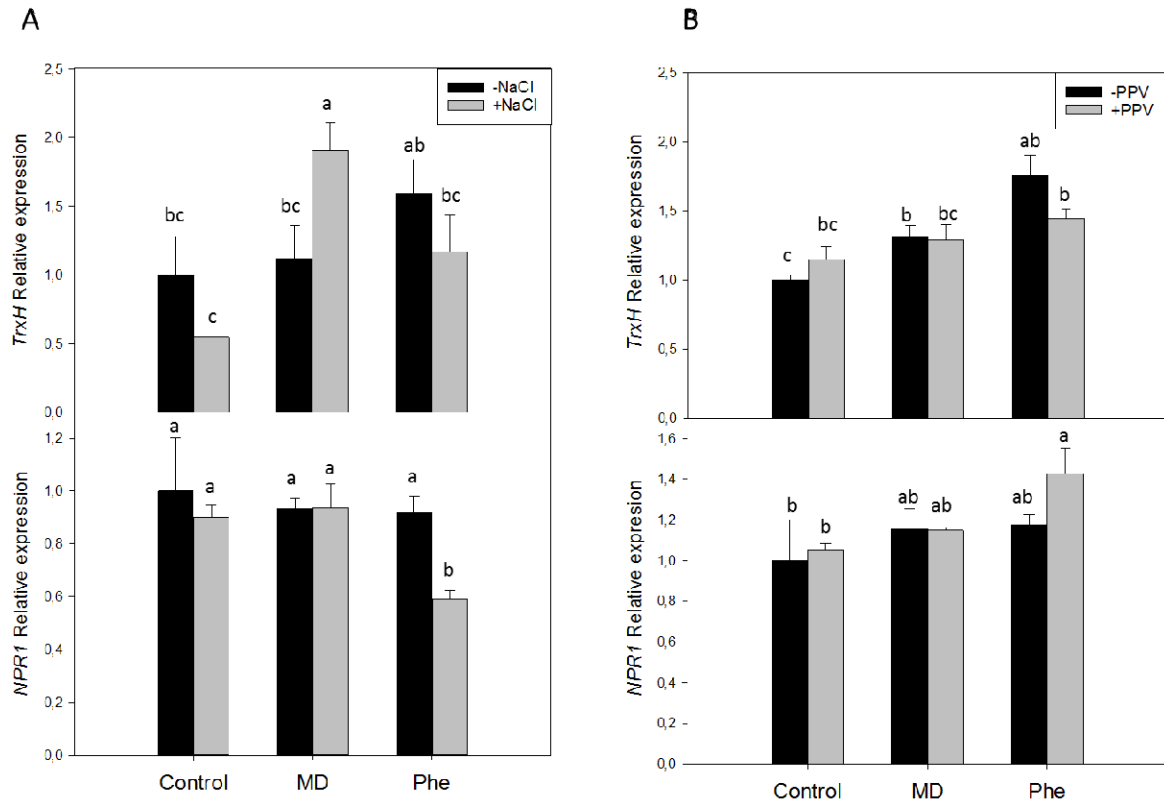

**Fig. 7**

789
